# Supplementary figures and images for: Improvement of DNA recognition through molecular imprinting: hybrid oligomer imprinted polymeric nanoparticles (oligoMIP NPs)
Source: Royal Society of Chemistry journal article supplement (doi:10.1039/c5bm00341e), 2015-10-28

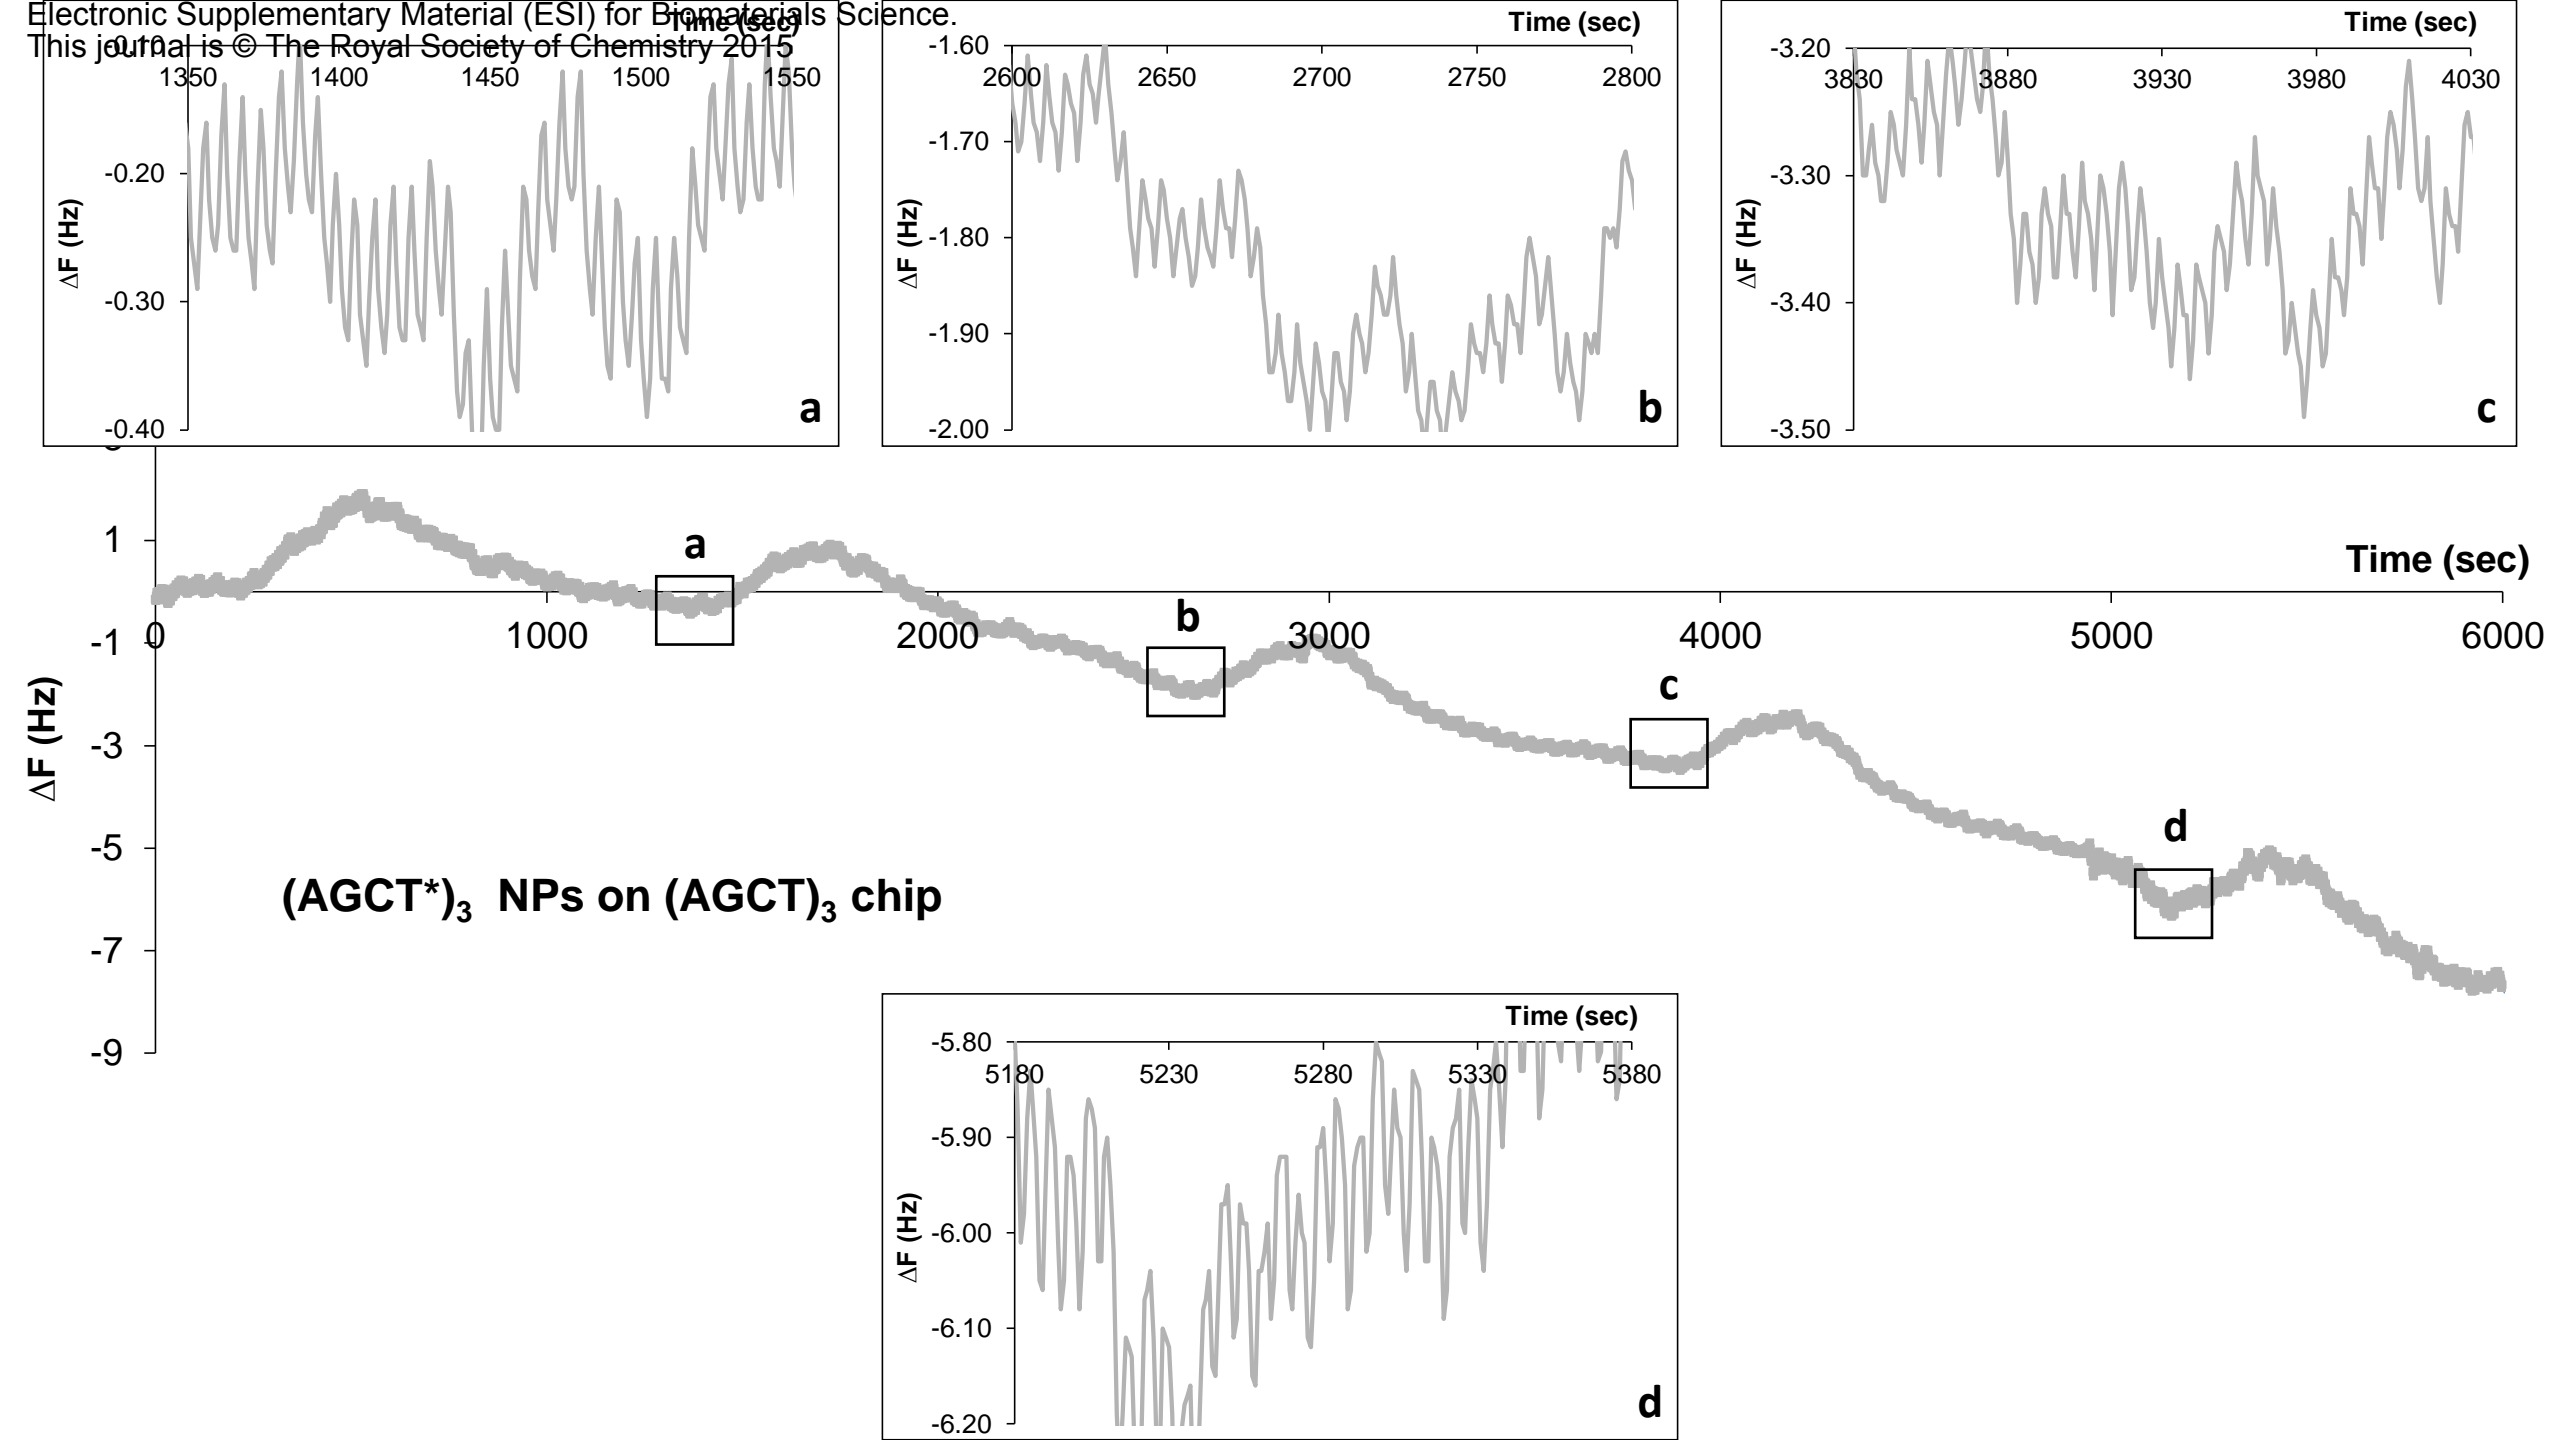

Supplement: c5bm00341e1.pdf [file c5bm00341e1.pdf]
